# Supplementary material for: Solvatofluorochromic flavonoid dyes with enlarged transition dipole moments enable the ratiometric detection of methanol in commercial biodiesel with improved sensitivities
Source: Royal Society of Chemistry journal article supplement (doi:10.1039/d0tc04542j), 2020-01-01
Supplement: d0tc04542j1.pdf [file d0tc04542j1.pdf]

**Electronic Supplementary Information (ESI)**

for

**Solvatofluorochromic flavonoid dyes with enlarged transition dipole  
moments enable ratiometric detection of methanol in commercial  
biodiesel with improved sensitivities**

Tianyi Qin,<sup>ab</sup> Bin Liu,<sup>b\*</sup> Bing Du,<sup>b</sup> Yingying Huang,<sup>b</sup> Guangkai Yao,<sup>a</sup> Zhiqing Xun,<sup>c</sup>

Hanhong Xu<sup>a\*</sup> and Chen Zhao<sup>a\*</sup>

<sup>a</sup> State Key Laboratory for Conservation and Utilization of Subtropical Agro-bioresources, Key Laboratory of Natural Pesticide and Chemical Biology of the Ministry of Education, South China Agricultural University, Guangzhou, 510642, Guangdong, China.

<sup>b</sup> Shenzhen Key Laboratory of Polymer Science and Technology, Guangdong Research Center for Interfacial Engineering of Functional Materials, College of Material Science and Engineering, Shenzhen University, Shenzhen, 518060, China.

<sup>c</sup> Guangzhou Quality Supervision and Testing Institute, 1-2 Zhujiang Rd, Guangzhou, 511447, China.

**Corresponding Authors:** Prof. Bin Liu, [bliu@szu.edu.cn](mailto:bliu@szu.edu.cn); Prof. Hanhong Xu, [hhxu@scau.edu.cn](mailto:hhxu@scau.edu.cn);

Prof. Chen Zhao, [zhaoc@scau.edu.cn](mailto:zhaoc@scau.edu.cn)

## Synthesis

*N,N*-diethyl-3-hydroxy-2-naphthamide (**1**). SOCl<sub>2</sub> (100 ml, 1 mol/L, 2.0 e.q.) and 3-hydroxy-2-naphthoic acid (10 g, 0.053 mol, 1 e.q.) were mixed at the N<sub>2</sub> atmosphere and stirred under reflux for 4 h. After cooling to the room temperature and removing the excess SOCl<sub>2</sub> in vacuum, the oily residue was obtained as crude acid chloride. A solution of the oily residue in 10 ml CH<sub>2</sub>Cl<sub>2</sub> was added dropwisely into a mixture of diethylamine (15.9 g, 0.26 mol, 5 e.q.) and 4-dimethylaminopyridine (0.1 e.q.) in 40 ml CH<sub>2</sub>Cl<sub>2</sub> at 0 °C under the Ar atmosphere. After stirring at room temperature for 10 h, the mixture was poured into 400 ml HCl (1 mol/L) solution and extracted with CH<sub>2</sub>Cl<sub>2</sub> (3 × 50 ml). Evaporating the solvents afforded the crude products, which were purified by recrystallizing from n-hexane/acetone mixture as white solid (10 g, 73%).  
<sup>1</sup>H-NMR (600 MHz, DMSO-*d*<sub>6</sub>) δ: 10.05 (s, 1H), 7.81 (d, *J* = 8.0 Hz, 1H), 7.70 (d, *J* = 8.1 Hz, 1H), 7.66 (s, 1H), 7.41 (t, *J* = 8.1 Hz, 1H), 7.29 (t, *J* = 7.5 Hz, 1H), 7.18 (s, 1H), 3.47 (m, 2H), 3.12 (m, 2H), 1.17 (m, 3H), 0.99 (m, 3H). <sup>13</sup>C-NMR (150 MHz, DMSO-*d*<sub>6</sub>), δ: 168.12, 151.94, 134.65, 128.70, 128.14, 127.73, 126.97, 126.94, 126.21, 123.64, 109.49, 56.64, 18.93. MS (HR ESI-TOF): *m/z*: calcd for C<sub>15</sub>H<sub>18</sub>NO<sub>2</sub><sup>+</sup> [M+H]<sup>+</sup>: 244.1332; found: 244.1329.

*1*-(3-hydroxynaphthalen-2-yl)ethan-1-one (**2**). Trimethylsilyl chloride (4.5 g, 0.042 mol, 1.2 e.q.) was added dropwisely to a vigorously stirred solution of **1** (9 g, 0.035 mol, 1 e.q.) and lithium diisopropylamide (70 ml, 0.14 mol, 4 e.q.) in extra dry THF under the Ar atmosphere with an ice-water bath. The reaction was stirred at 0 °C for

30 minutes and then the ice-water bath was removed. After stirring for another 30 minutes when the temperature gradually rose to the room temperature. The Schlenk flask was cooled down to 0 °C again with the addition of 100 ml HCl (1 mol/L) for quenching. The mixture was extracted with ethyl acetate (3 × 50 ml) and washed by saturated brine water. After drying over Na<sub>2</sub>SO<sub>4</sub>, filtering, and concentrating, the crude products were purified by column chromatography on silica gel (eluent: n-hexane to CH<sub>2</sub>Cl<sub>2</sub>) and provided **3** as yellow solid (6.1 g, 87%). <sup>1</sup>H-NMR (600 MHz, DMSO-*d*<sub>6</sub>) δ: 11.31 (s, 1H), 8.62 (s, 1H), 7.99 (d, *J* = 8.1 Hz, 1H), 7.76 (d, *J* = 8.2 Hz, 1H), 7.56 (t, *J* = 8.2, Hz, 1H), 7.38 (t, *J* = 8.0 Hz, 1H), 7.29 (s, 1H), 2.78 (s, 3H). <sup>13</sup>C-NMR (150 MHz, DMSO-*d*<sub>6</sub>), δ: 205.00, 156.16, 129.97, 137.67, 134.24, 129.86, 127.15, 126.32, 124.35, 123.27, 111.43, 28.64. MS (HR ESI-TOF): *m/z*: calcd for C<sub>12</sub>H<sub>11</sub>O<sub>2</sub><sup>+</sup> [M+H]<sup>+</sup>: 187.0754; found: 187.0751.

## Additional Scheme, Table and Figures

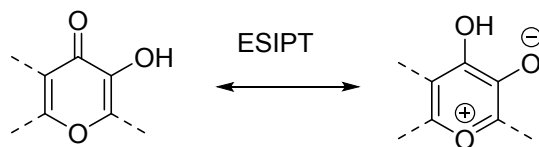

**Scheme S1** The ES IPT process of flavonoid dyes.

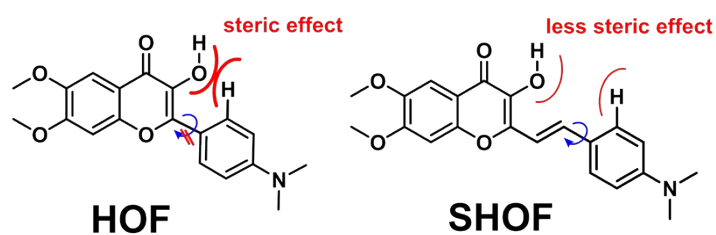

**Scheme S2** Comparison of steric effects and rotation between **HOF** and **SHOF**.

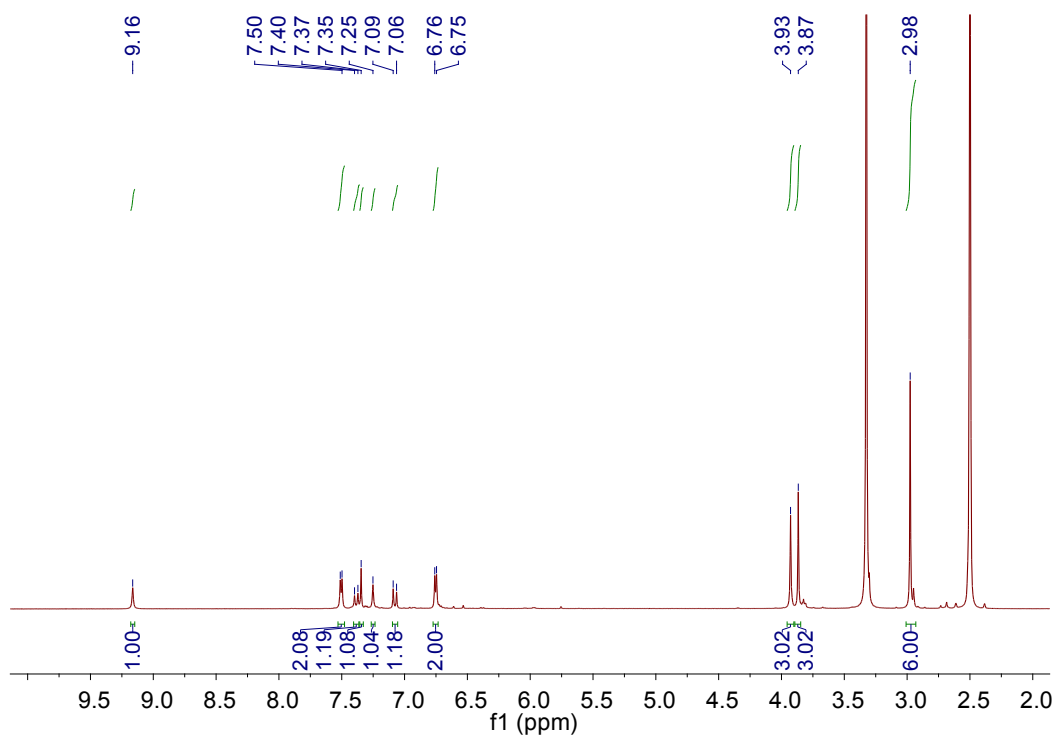

**Fig. S1**  $^1\text{H}$  NMR spectrum of **SHOF** in  $\text{DMSO-}d_6$ .

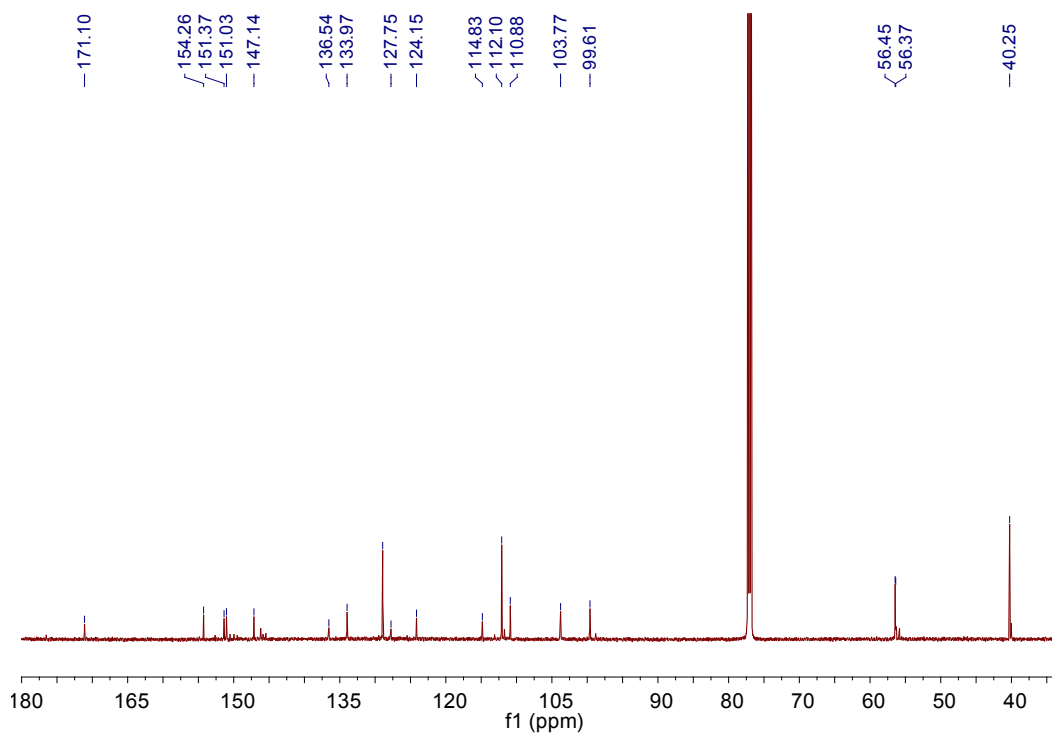

**Fig. S2**  $^{13}\text{C}$  NMR spectrum of **SHOF** in  $\text{CDCl}_3$ .

Positive mode

14 #27 RT: 0.27 AV: 1 NL: 5.51E9  
T: FTMS + p ESI Full ms [100.0000-800.0000]

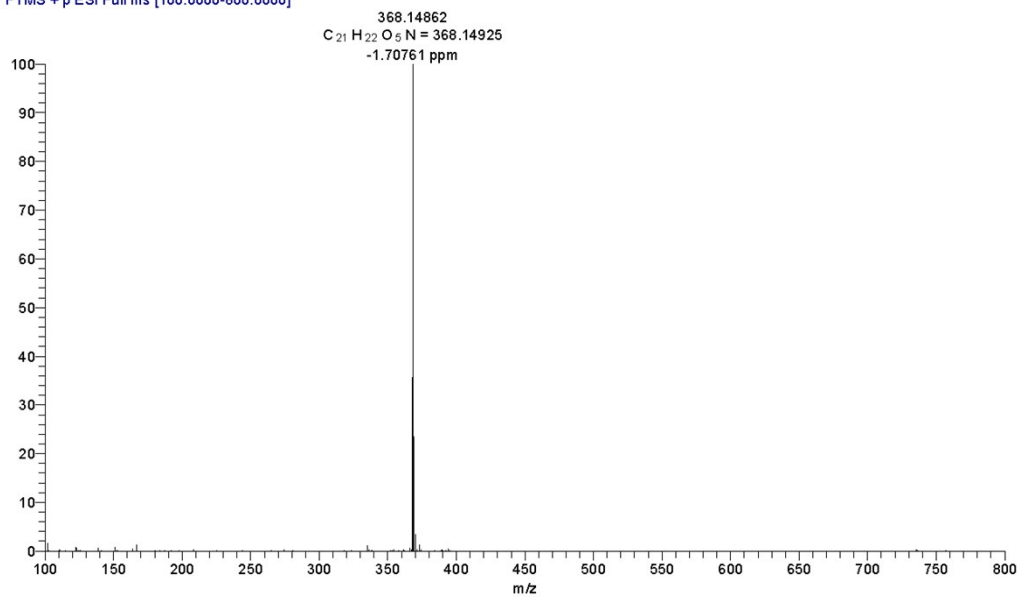

**Fig. S3** HR ESI-TOF MS spectrum of **SHOF**.

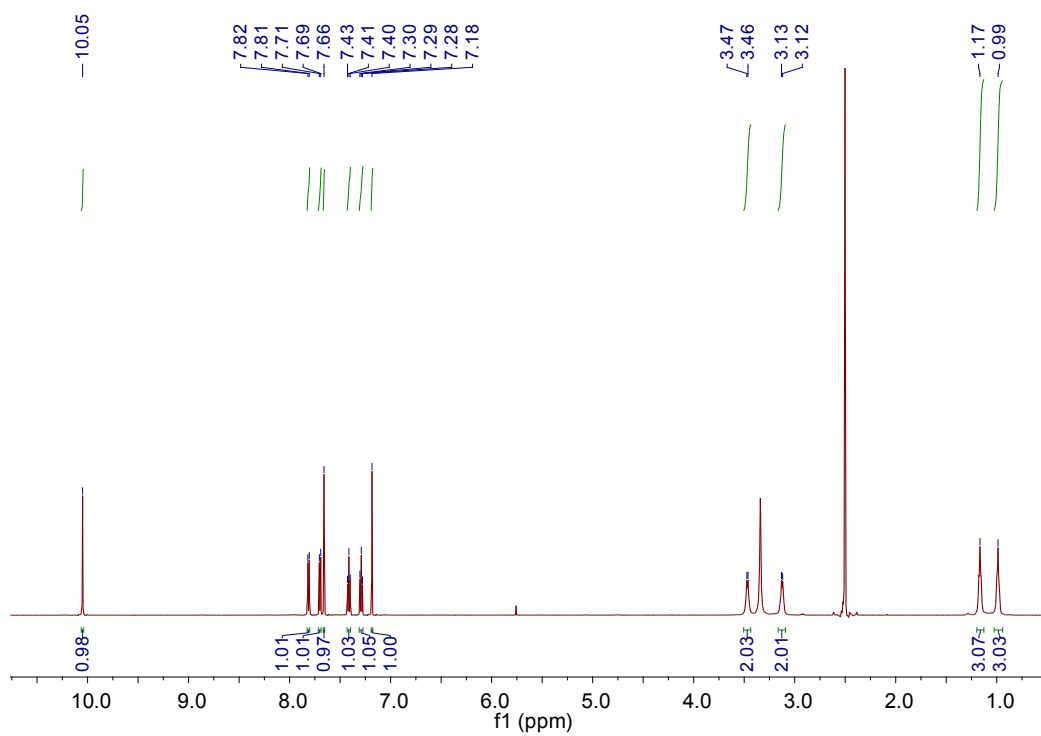

**Fig. S4**  $^1\text{H}$  NMR spectrum of **1** in  $\text{DMSO-}d_6$ .

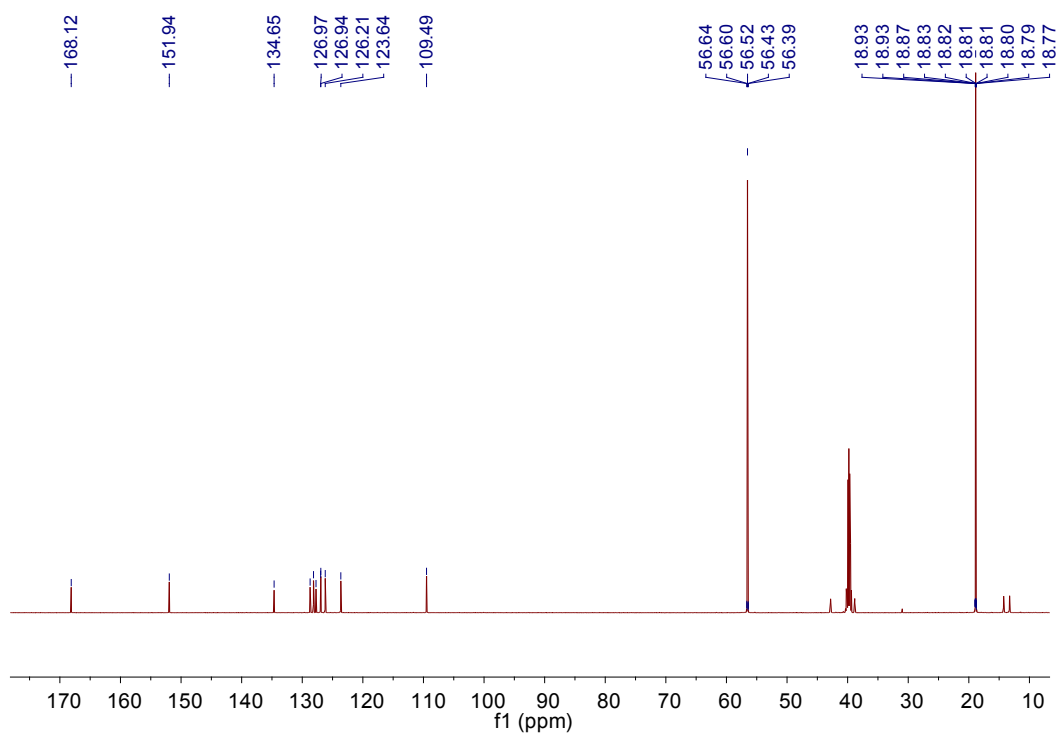

**Fig. S5**  $^{13}\text{C}$  NMR spectrum of **1** in  $\text{DMSO-}d_6$ .

Positive mode

n2\_190704163817 #89 RT: 0.89 AV: 1 NL: 4.68E8  
T: FTMS + p ESI Full ms [100.0000-800.0000]

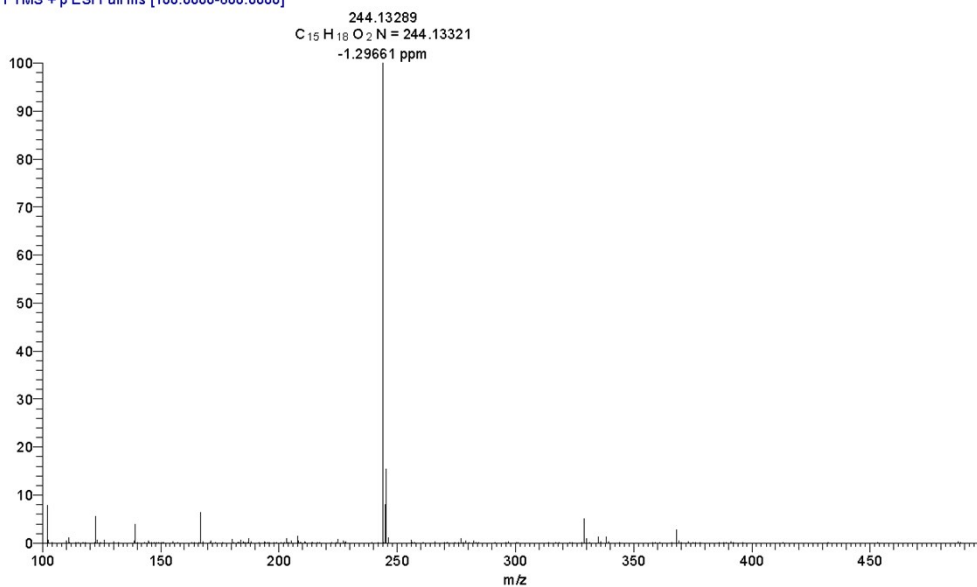

Fig. S6 HR ESI-TOF MS spectrum of 1.

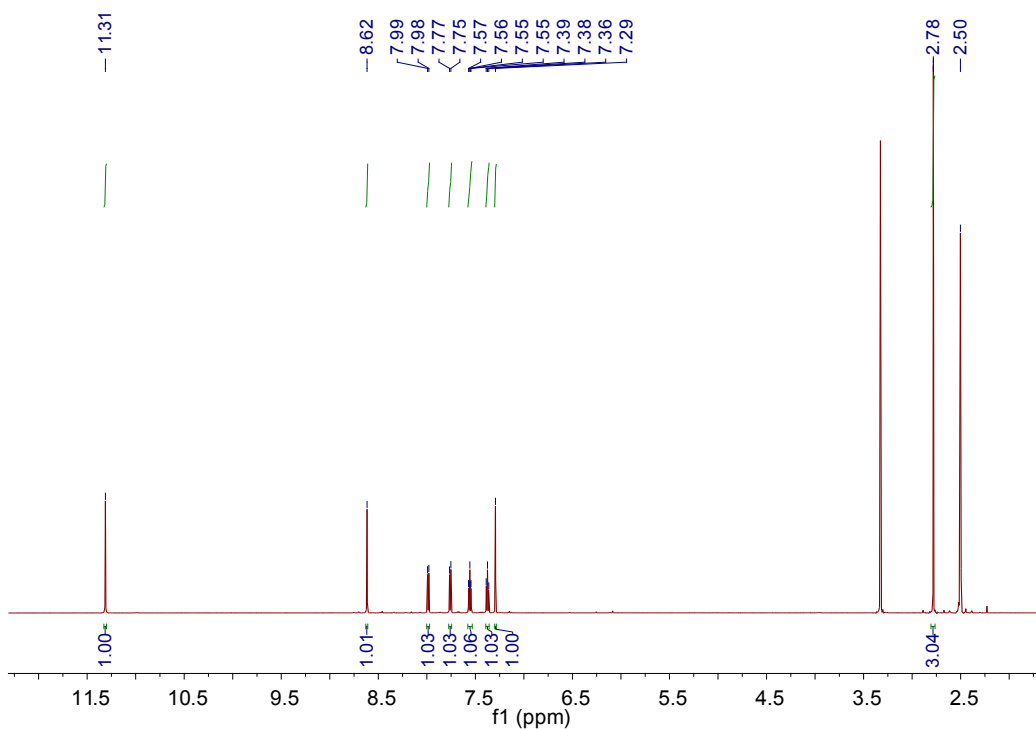

Fig. S7 <sup>1</sup>H NMR spectrum of 2 in DMSO-*d*<sub>6</sub>.

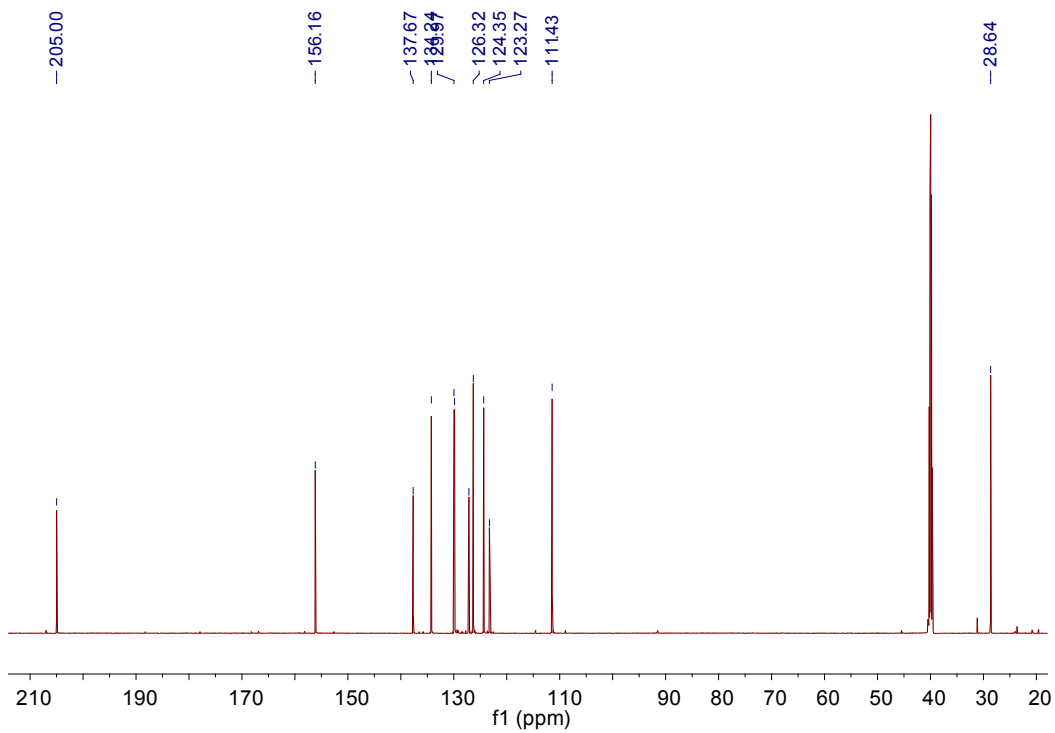

Fig. S8 <sup>13</sup>C NMR spectrum of 2 in DMSO-*d*<sub>6</sub>.

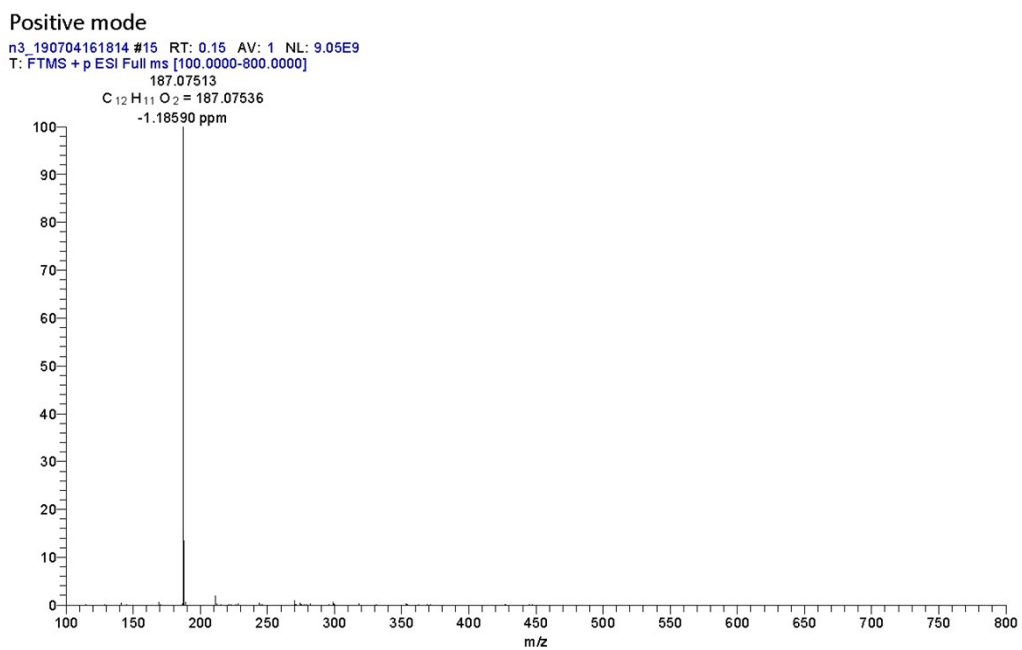

Fig. S9 HR ESI-TOF MS spectrum of 2.



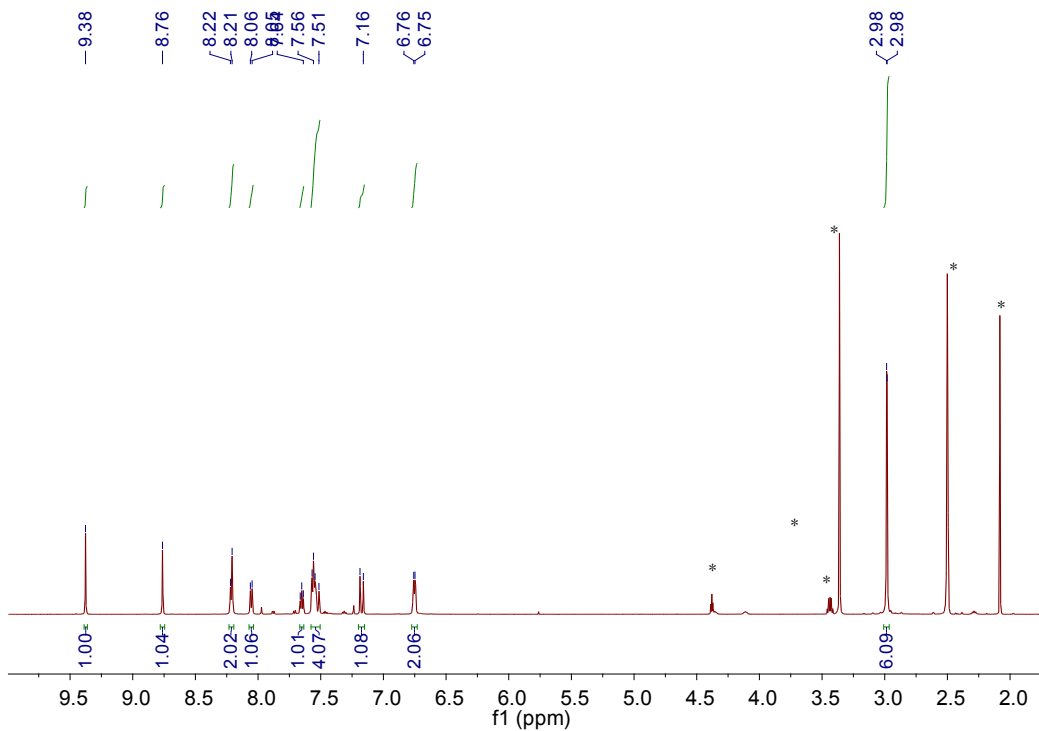

**Fig. S10**  $^1\text{H}$  NMR spectrum of NSHOF in  $\text{DMSO-}d_6$ .

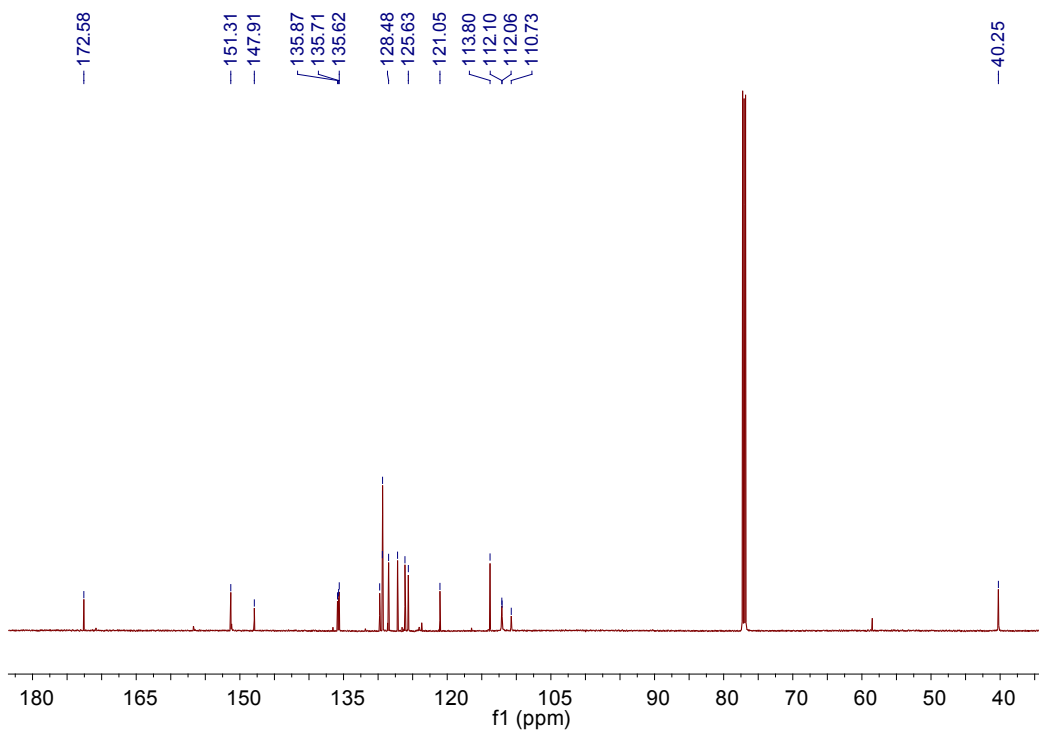

**Fig. S11**  $^{13}\text{C}$  NMR spectrum of NSHOF in  $\text{CDCl}_3$ .

Positive mode

n21\_190704162352 #27 RT: 0.26 AV: 1 NL: 4.15E9  
T: FTMS + p ESI Full ms [100.0000-800.0000]

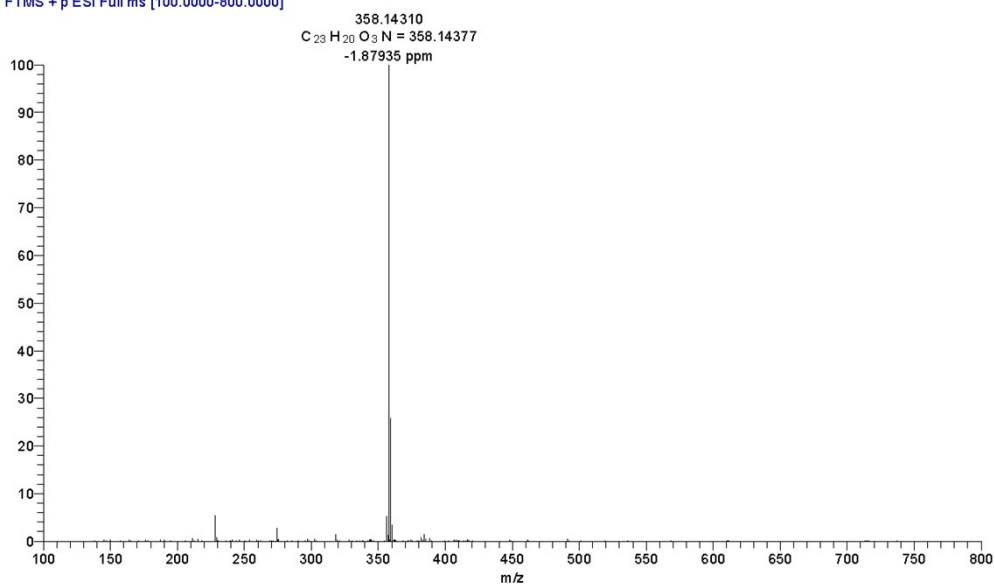

**Fig. S12** HR ESI-TOF MS spectrum of NSHOF.

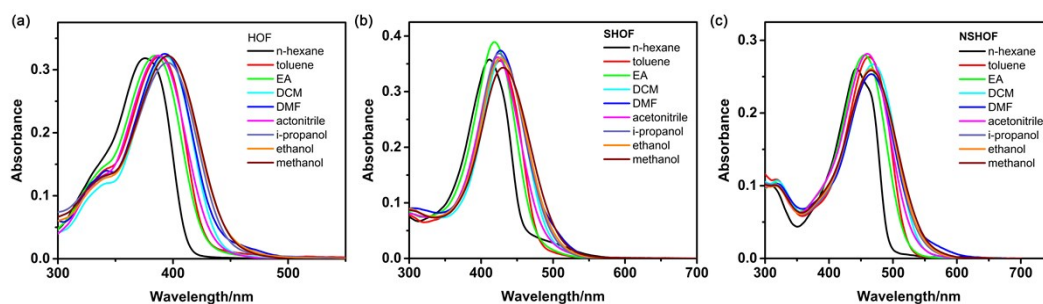

**Fig. S13** The absorption spectra of HOF, SHOF, and NSHOF in organic solvents.

$$[\text{HOF}] = [\text{SHOF}] = [\text{NSHOF}] = 10^{-5} \text{ M.}$$

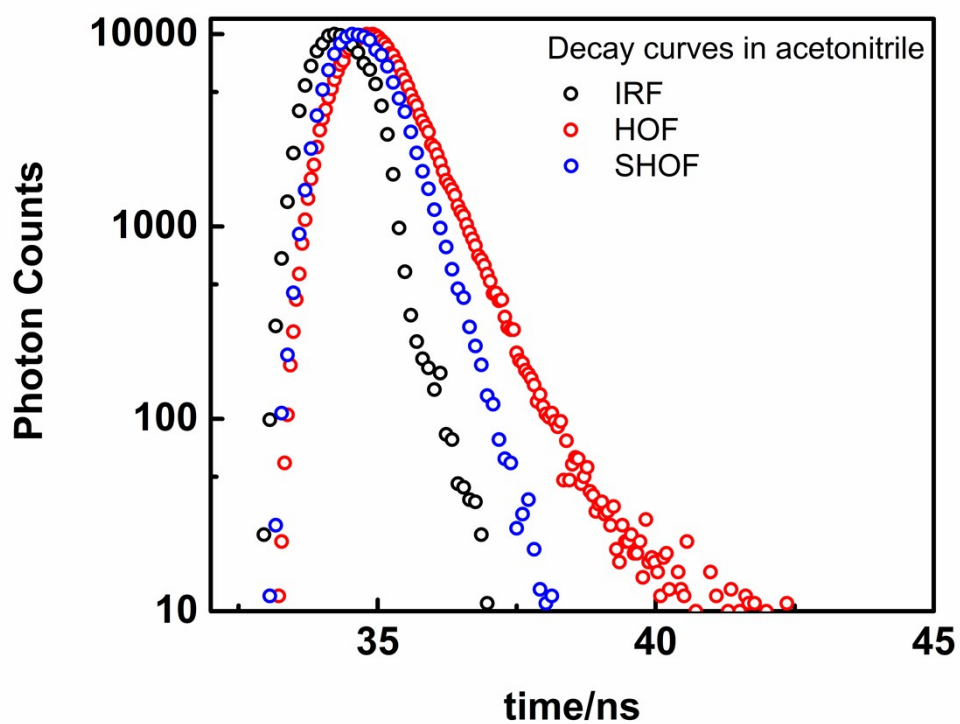

**Fig. S14** Fluorescence decay curves of **HOF** and **SHOF** in acetonitrile. Excitation wavelength was 392 nm. IRF: instrument response function (prompt).

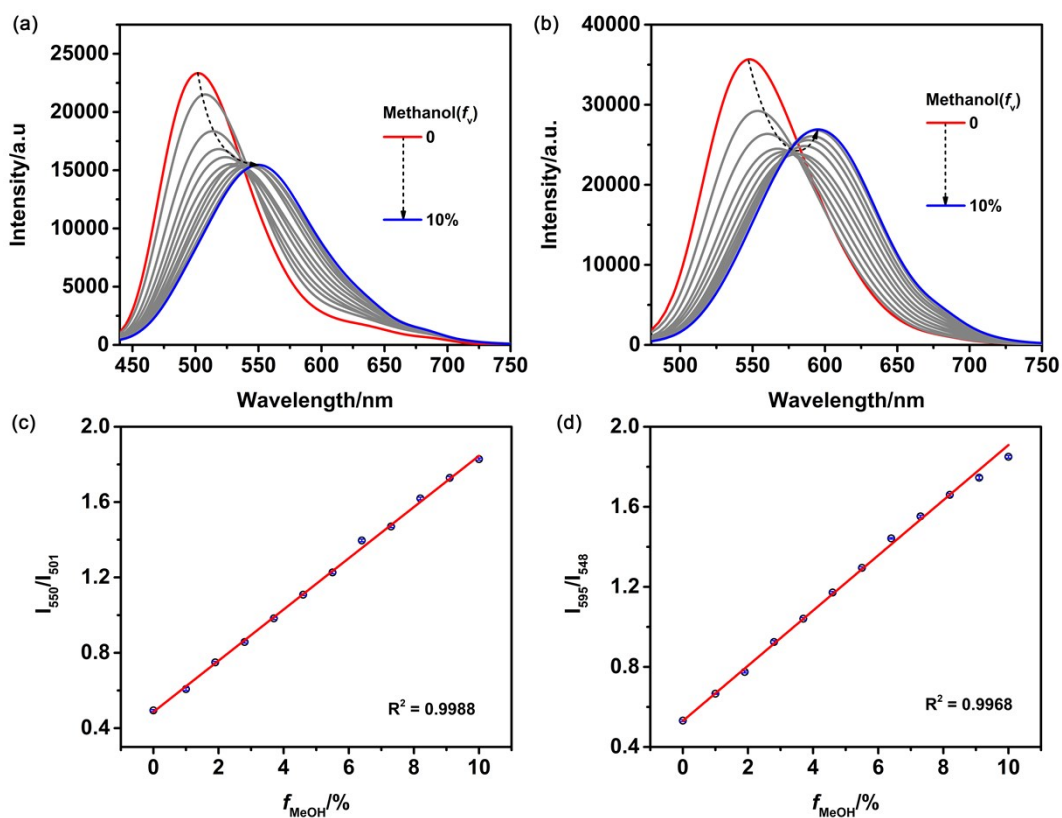

**Fig. S15** (a, b) The fluorescent spectra of **SHOF** and **NSHOF** in biodiesel/methanol mixture ( $f_{\text{MeOH}}$ : 0 ~ 10%), The excitation wavelengths for **SHOF** and **NSHOF** were 420 nm and 460 nm, respectively. (c, d) The fluorescent intensity ratio of **SHOF** ( $I_{550}/I_{501}$ ) and **NSHOF** ( $I_{595}/I_{548}$ ) in biodiesel/methanol mixture ( $f_{\text{MeOH}}$ : 0 ~ 10%).  $[\text{SHOF}] = [\text{NSHOF}] = 10^{-5}$  M. Error bars were calculated from three parallel experiments.

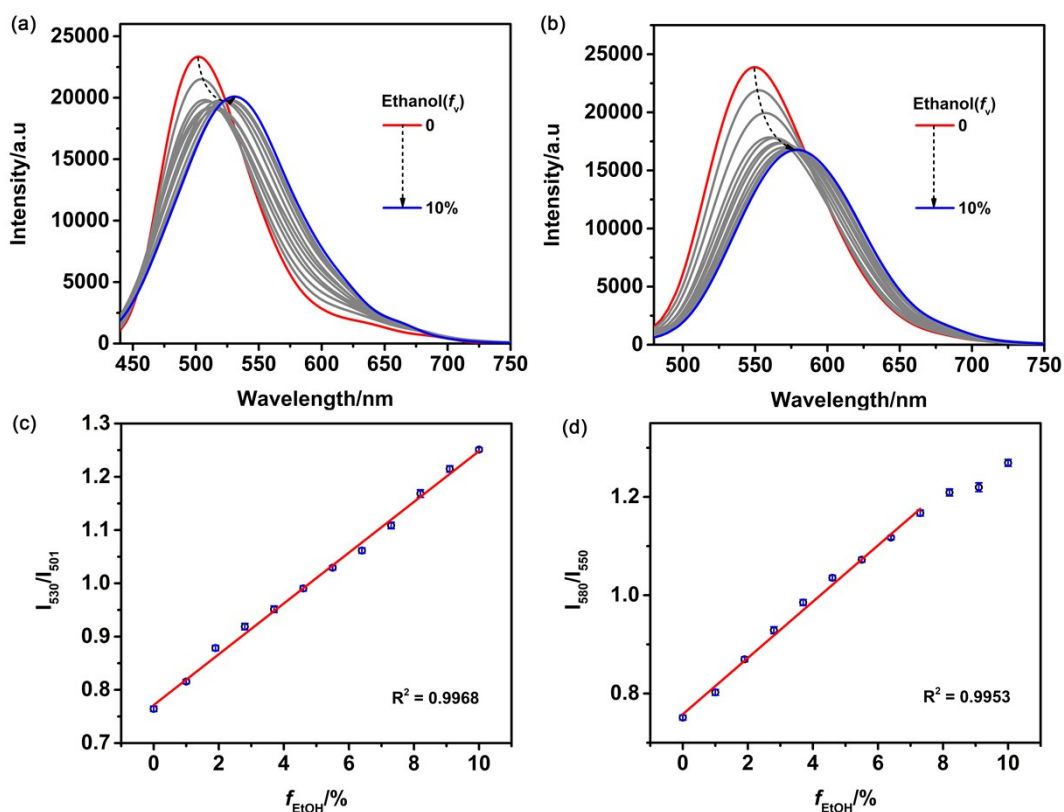

**Fig. S16** (a, b) The fluorescent spectra of **SHOF** and **NSHOF** in biodiesel/ethanol mixture ( $f_{\text{EtOH}}$ : 0 ~ 10%), The excitation wavelengths for **SHOF** and **NSHOF** were 420 nm and 460 nm, respectively. (c, d) The fluorescent intensity ratio of **SHOF** ( $I_{530}/I_{501}$ ) and **NSHOF** ( $I_{580}/I_{550}$ ) in biodiesel/ethanol mixture ( $f_{\text{EtOH}}$ : 0 ~ 10%).  $[\text{SHOF}] = [\text{NSHOF}] = 10^{-5}$  M. Error bars were calculated from three parallel experiments.

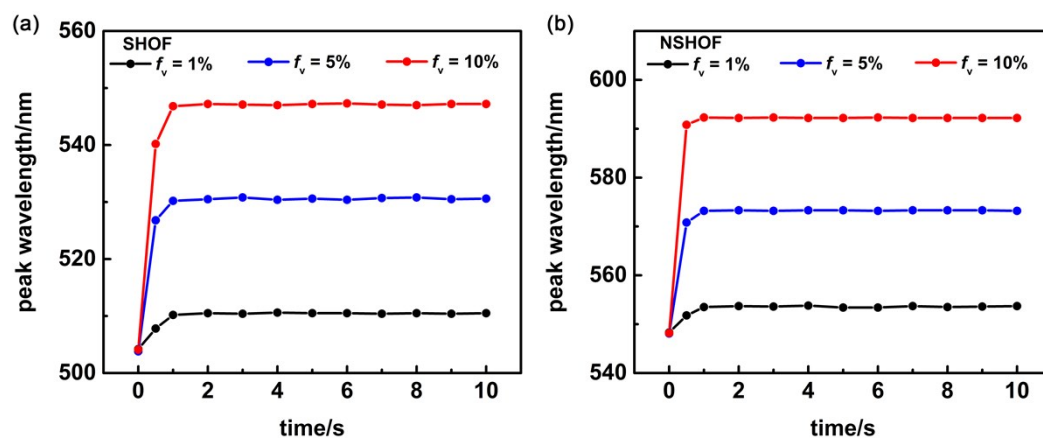

**Fig. S17** The response time of **SHOF** (a) and **NSHOF** (b) in biodiesel with  $f_{\text{MeOH}}$  of 1% (black line), 5% (blue line), and 10% (red line) over a time scale from 0 to 10 min.

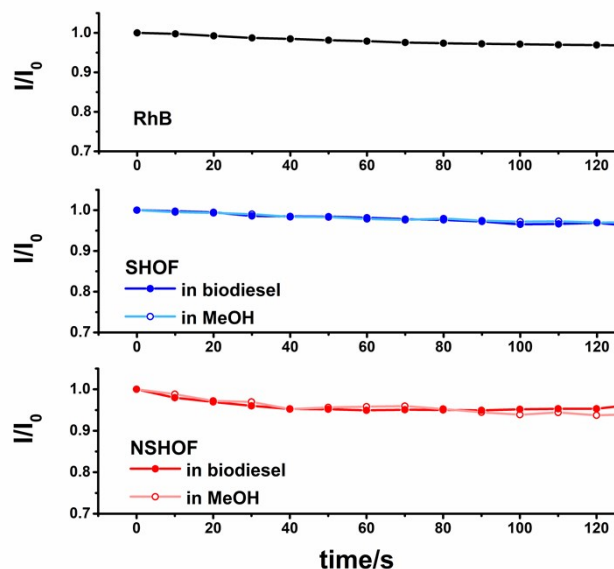

**Fig. S18** The time-scan fluorescent spectra of rhodamine B (Ex/Em: 550/580) in DCM and **SHOF** (Ex/Em: 420/500), **NSHOF** (Ex/Em: 460/550) in biodiesel. The concentration of each sample was  $10^{-5}$  M.

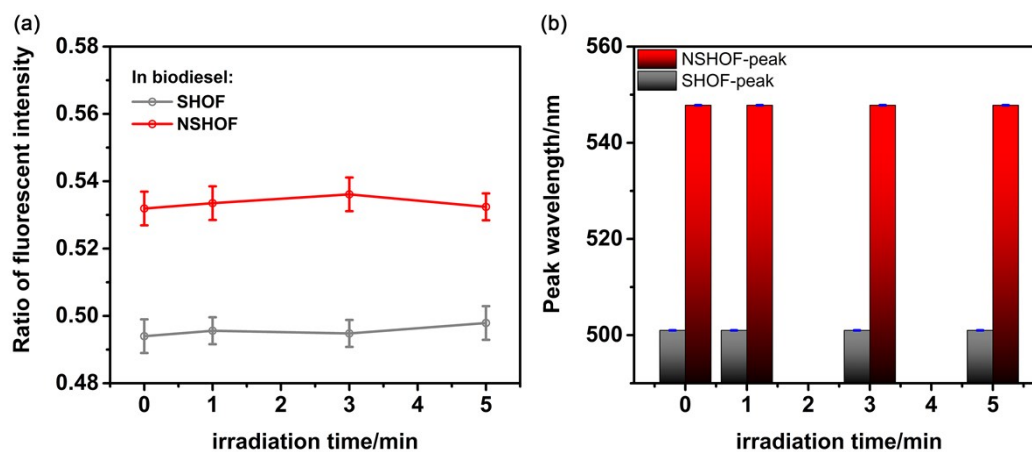

**Fig. S19** The fluorescent ratio and peak wavelength of **SHOF** and **NSHOF** after continuous irradiation of UV light ( $\sim 365$  nm),  $c = 10^{-5}$  M. The excitation wavelengths

for **SHOF** and **NSHOF** were 420 nm and 460 nm, respectively. Error bars were calculated from three parallel experiments.

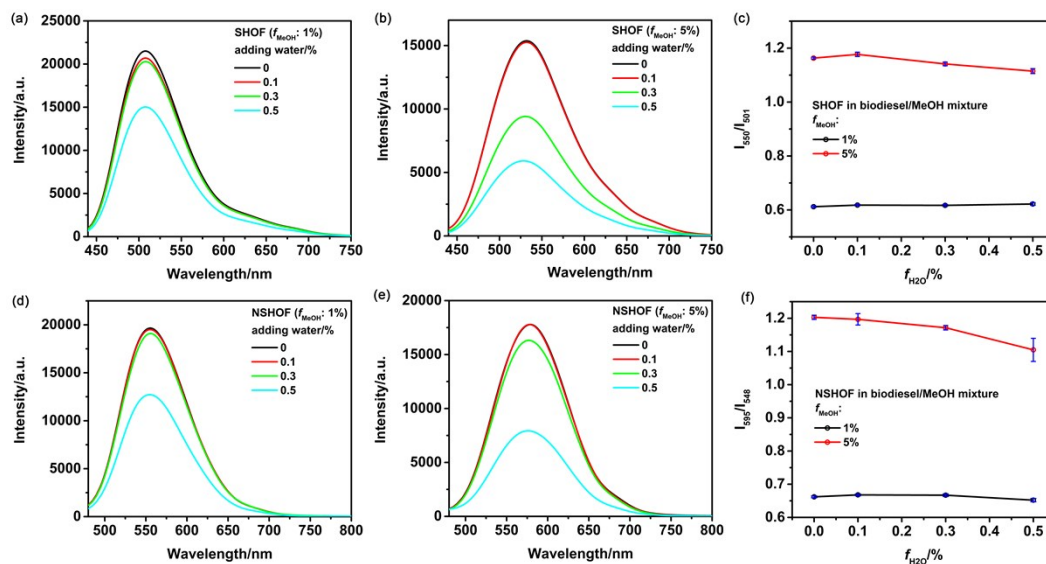

**Fig. S20** The fluorescent spectra of **SHOF** (a, b) and **NSHOF** (d, e) in biodiesel/methanol mixture with water ( $f_{\text{H}_2\text{O}}$ : 0, 0.1%, 0.3%, 0.5%). (c) and (f) The interference of water on the fluorescent ratios of **SHOF** ( $I_{550}/I_{501}$ ) and **NSHOF** ( $I_{595}/I_{548}$ ). The excitation wavelengths for **SHOF** and **NSHOF** were 420 nm and 460 nm, respectively. Error bars were calculated from three parallel experiments.

$f_{\text{MeOH}} = 1\%$

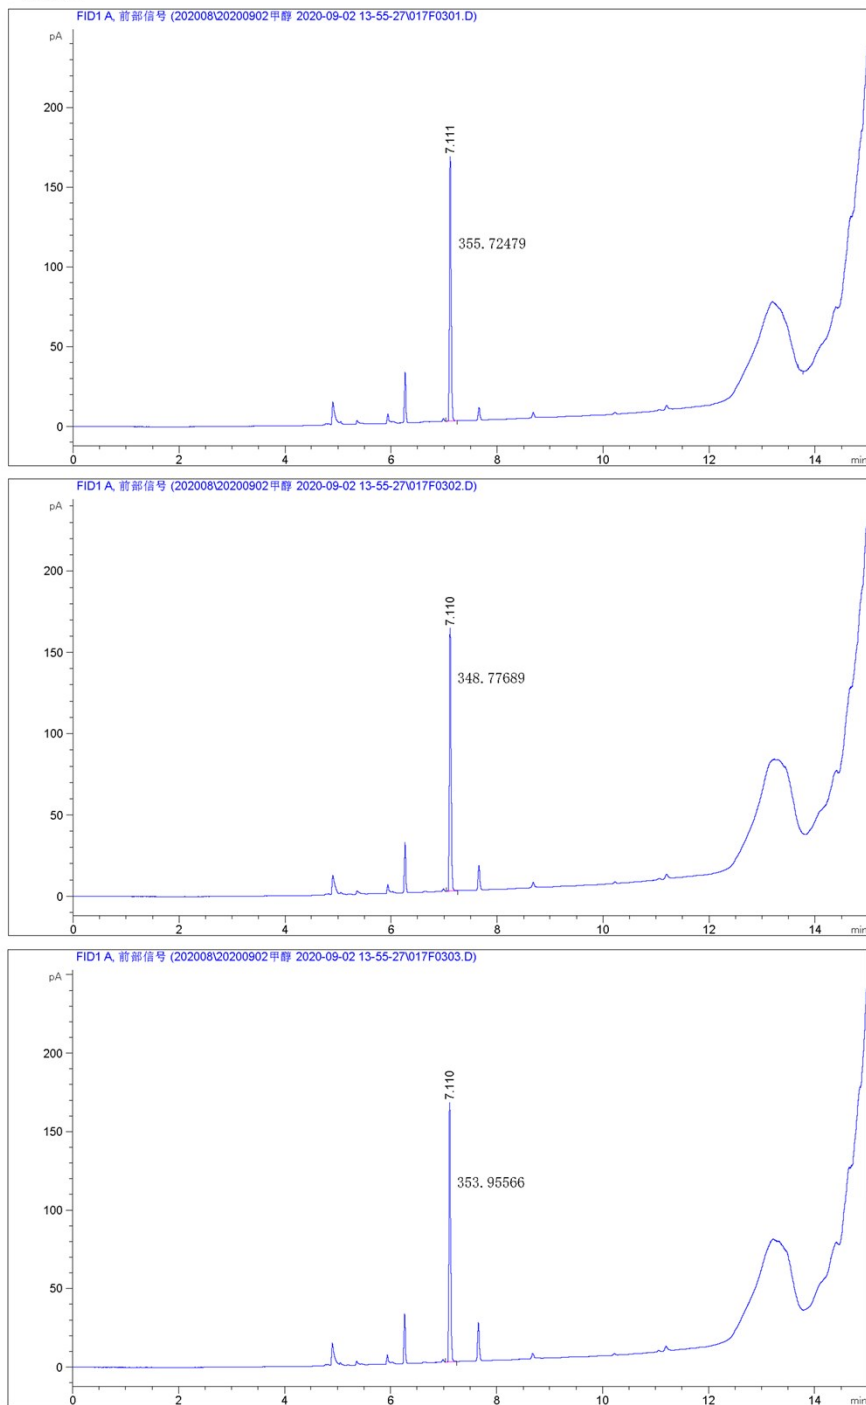

**Fig. S21** Three parallel GC results of biodiesel sample with spiked methanol ( $f_{\text{MeOH}} = 1\%$ ).



$f_{\text{MeOH}} = 2\%$

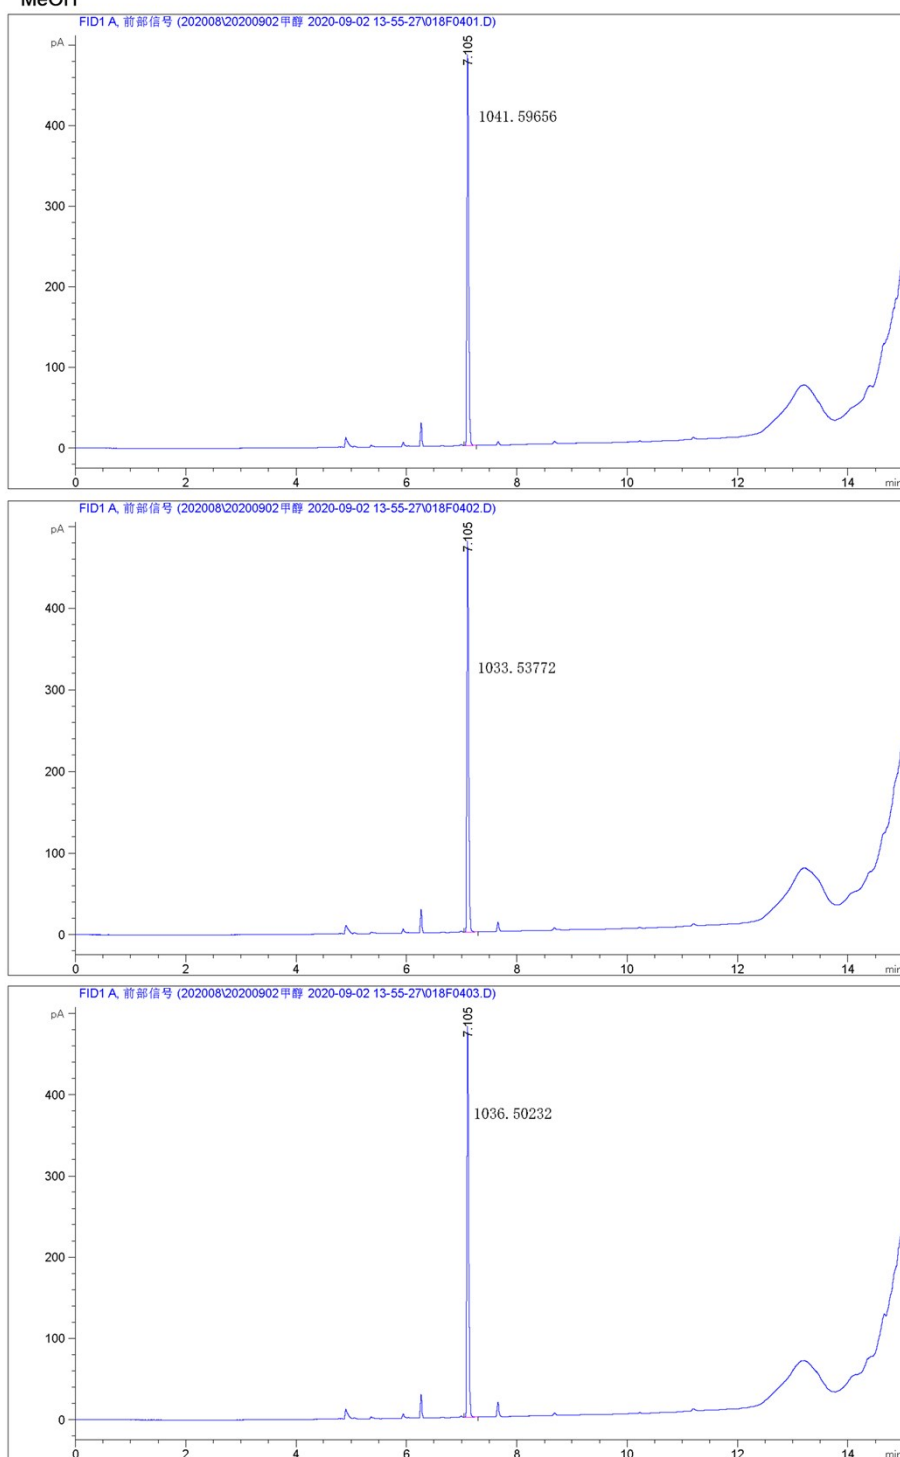

**Fig. S22** Three parallel GC results of biodiesel sample with spiked methanol ( $f_{\text{MeOH}} = 2\%$ ).

$f_{\text{MeOH}} = 3\%$

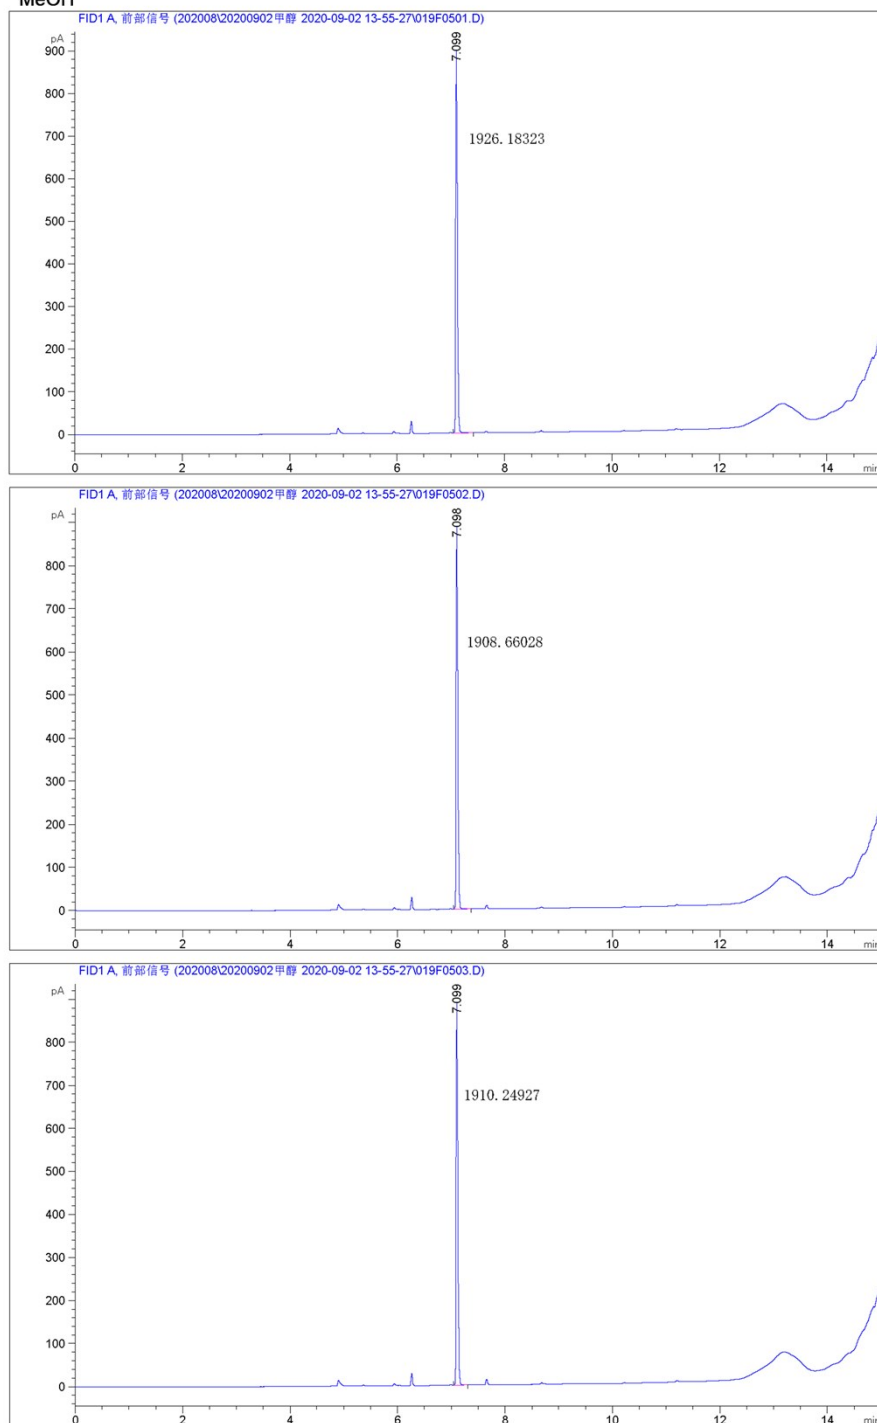

**Fig. S23** Three parallel GC results of biodiesel sample with spiked methanol ( $f_{\text{MeOH}} = 3\%$ ).

$f_{\text{MeOH}} = 4\%$

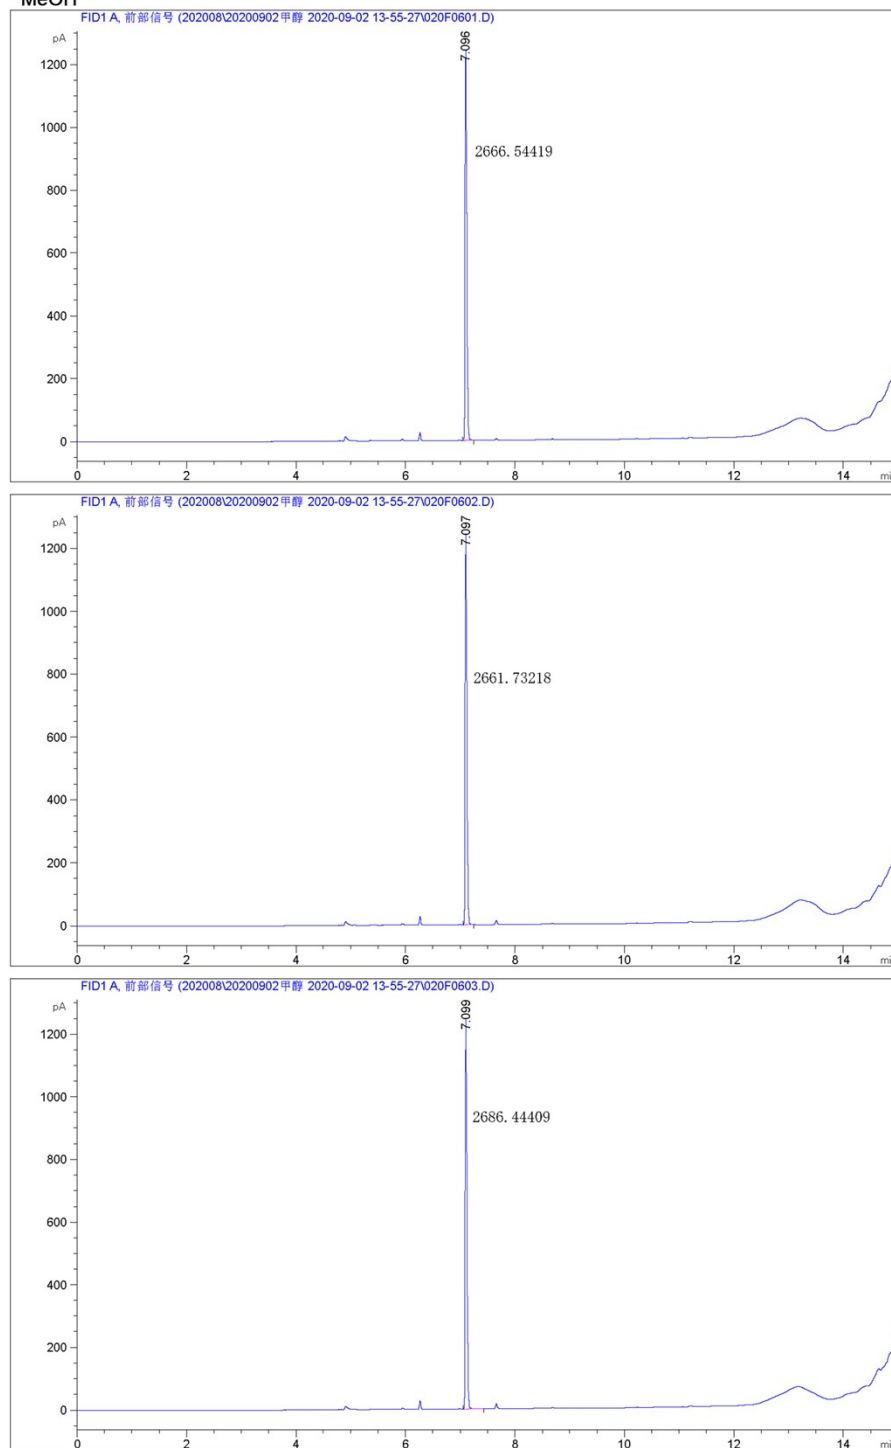

**Fig. S24** Three parallel GC results of biodiesel sample with spiked methanol ( $f_{\text{MeOH}} = 4\%$ ).

$f_{\text{MeOH}} = 5\%$

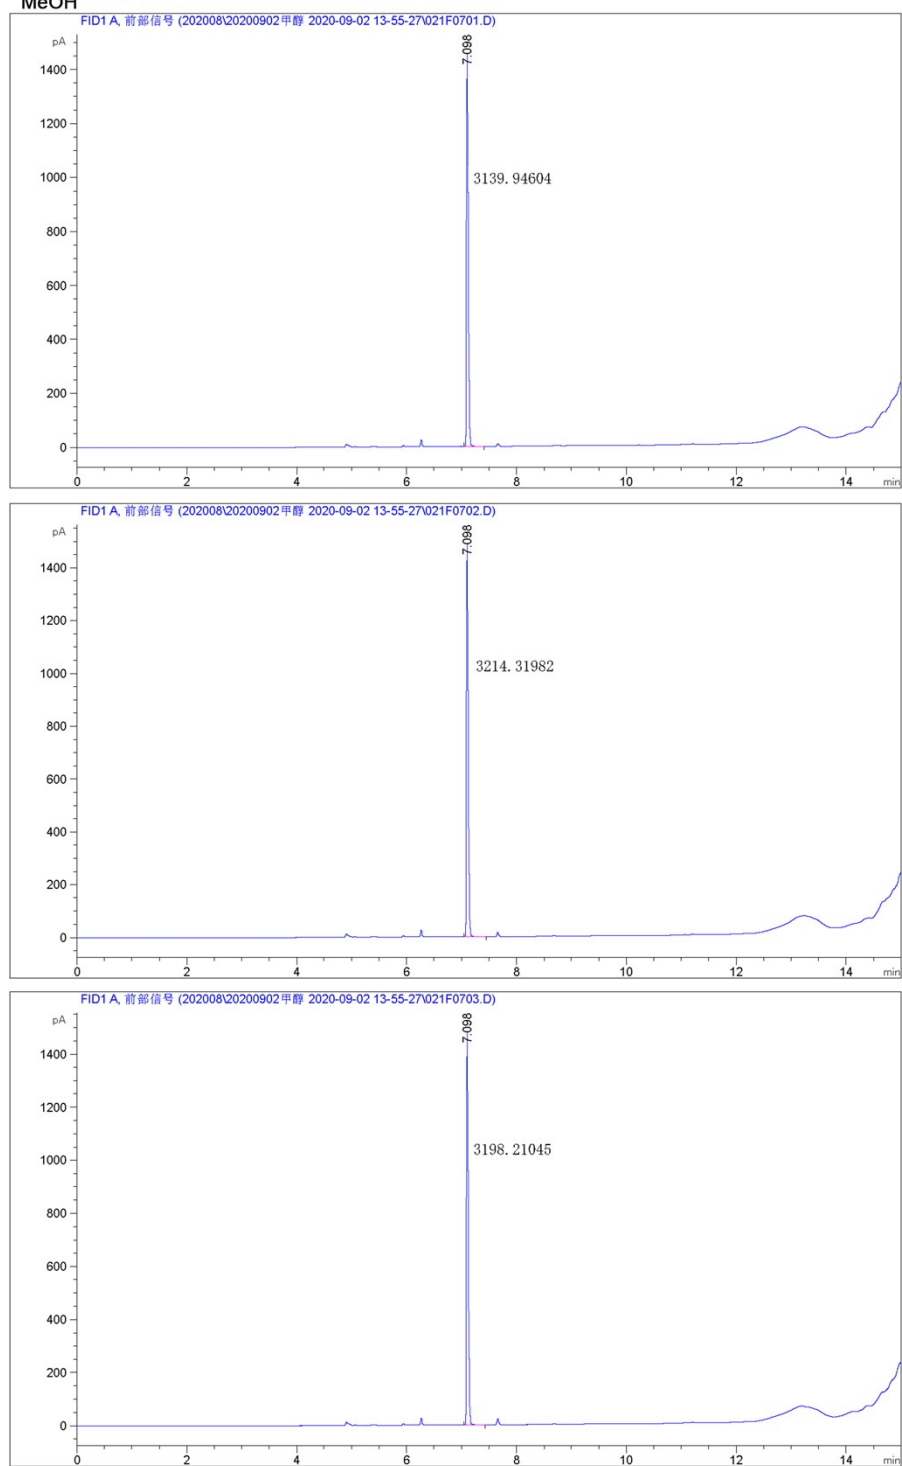

**Fig. S25** Three parallel GC results of biodiesel sample with spiked methanol ( $f_{\text{MeOH}} = 5\%$ ).

**Table S1** The radiation ( $k_r$ ) and non-radiation ( $k_{nr}$ ) rates of **HOF** and **SHOF** in acetonitrile.

|             | $\tau/ns$ | $\Phi_F$ | $k/ns^{-1}$ | $k_r/ns^{-1}$ | $k_{nr}/ns^{-1}$ |
|-------------|-----------|----------|-------------|---------------|------------------|
| <b>HOF</b>  | 0.56      | 0.15     | 1.79        | 0.27          | 1.52             |
| <b>SHOF</b> | 0.13      | 0.05     | 7.69        | 0.38          | 7.31             |

**Table S2** The color information of **HOF**, **SHOF**, and **NSHOF** in biodiesel with varying methanol content ( $f_v$ ).

|              | $f_v$ (%) | R   | G   | B   | $L^*$ | $a^*$ | $b^*$ | $\Delta E^*$ (between $f_n$ and $f_{n-1}$ , n: 1~10) |
|--------------|-----------|-----|-----|-----|-------|-------|-------|------------------------------------------------------|
| <b>HOF</b>   | 0         | 218 | 216 | 38  | 84.5  | -12.6 | 77.5  | -                                                    |
|              | 1         | 218 | 222 | 40  | 86.1  | -15.4 | 78.4  | 3.3                                                  |
|              | 2         | 218 | 223 | 47  | 86.3  | -15.7 | 76.9  | 1.5                                                  |
|              | 3         | 214 | 222 | 56  | 85.8  | -16.6 | 73.8  | 3.3                                                  |
|              | 4         | 209 | 219 | 61  | 84.6  | -17.1 | 71    | 3.1                                                  |
|              | 5         | 204 | 216 | 65  | 83.4  | -17.7 | 68.4  | 2.9                                                  |
| <b>SHOF</b>  | 0         | 35  | 215 | 171 | 77    | -52.5 | 35.7  | -                                                    |
|              | 1         | 80  | 221 | 139 | 79.1  | -53.5 | 28.7  | 19.8                                                 |
|              | 2         | 125 | 223 | 114 | 81    | -46   | 43.7  | 16.9                                                 |
|              | 3         | 170 | 219 | 113 | 82.2  | -29.4 | 46.3  | 16.8                                                 |
|              | 4         | 193 | 226 | 84  | 85.5  | -25.7 | 63    | 17.4                                                 |
|              | 5         | 184 | 212 | 60  | 80.8  | -24.1 | 67    | 6.4                                                  |
| <b>NSHOF</b> | 0         | 114 | 162 | 6   | 61.4  | -31.3 | 61.2  | -                                                    |
|              | 1         | 163 | 204 | 1   | 76.9  | -30.1 | 75.1  | 20.9                                                 |
|              | 2         | 172 | 192 | 1   | 74.2  | -21.2 | 73.4  | 9.5                                                  |
|              | 3         | 208 | 195 | 1   | 78    | -7.3  | 77.6  | 15                                                   |

|   |     |     |   |      |      |      |      |
|---|-----|-----|---|------|------|------|------|
| 4 | 190 | 146 | 1 | 63.4 | 9.4  | 66.9 | 24.6 |
| 5 | 184 | 99  | 1 | 51.4 | 31.3 | 59.3 | 26.1 |

**Table S3** Comparison of the GC method and two fluorescent probes for methanol in biodiesel.

| Sample <sup>a</sup> | Spiked  | GC method    | SHOF         | Recover | RSD          | NSHOF        | Recover | RSD          |
|---------------------|---------|--------------|--------------|---------|--------------|--------------|---------|--------------|
|                     | methano | (mean±SD)    | (mean±SD)    | y       | <sup>c</sup> | (mean±SD)    | y       | <sup>c</sup> |
|                     | 1       | <sup>b</sup> | <sup>b</sup> | y       | <sup>c</sup> | <sup>b</sup> | y       | <sup>c</sup> |
|                     |         | /%           | /%           | /%      | /%           | /%           | /%      | /%           |
|                     | 1       | 0.99±0.005   | 0.90±0.03    | 91      | 3.3          | 0.88±0.04    | 88      | 4.5          |
| Biodiese            | 2       | 1.90±0.005   | 1.89±0.07    | 95      | 3.7          | 1.90±0.05    | 95      | 2.6          |
| 1                   | 3       | 3.00±0.001   | 2.92±0.02    | 97      | 0.7          | 3.08±0.05    | 102     | 1.6          |
| samples             | 4       | 4.00±0.017   | 4.09±0.01    | 102     | 0.2          | 3.94±0.03    | 99      | 0.8          |
|                     | 5       | 4.70±0.012   | 4.87±0.01    | 97      | 0.2          | 5.10±0.02    | 102     | 0.4          |

**NOTE:** <sup>a</sup> The samples were prepared artificially by adding methanol (1 ~ 5%) into biodiesel samples; <sup>b</sup> mean of three parallel experiments, SD = standard deviation;  $\Delta f$  is the polarizability factor in Lippert-Mataga equation; <sup>c</sup> Relative standard deviation of mean recovery (RSD (%) = (SD/mean) × 100).
